# Supplementary material for: Pulsatile-flow culture: a novel system for assessing vascular-cell dynamics
Source: Royal Society of Chemistry journal article supplement (doi:10.1039/d4lc00949e), 2025-01-01
Supplement: d4lc00949e1.pdf [file d4lc00949e1.pdf]

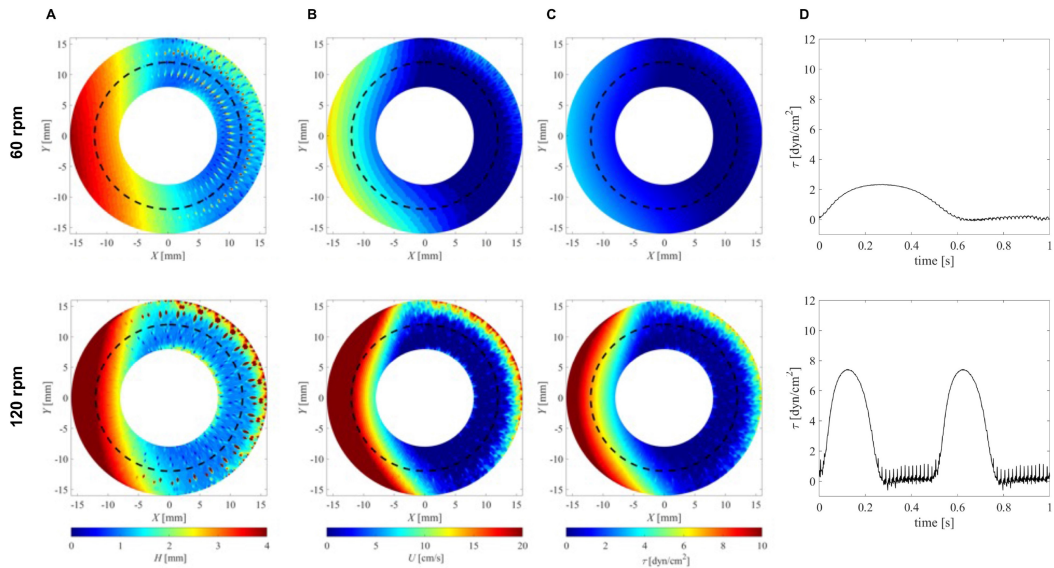

**Fig. S1** Examples of flow-culture dynamics at two different rotational speeds for the low viscosity medium ( $\mu = 1 \text{ mPa} \cdot \text{s}$ ). (A) Heat maps of fluid layer thickness  $H$ . (B) Heat maps of surface velocity  $U$ . (C) Heat maps of bed shear stress fields  $\tau$ . (D) Waveform of bed shear stress at a radius of 12 mm (corresponding to dashed circular line in A, B, C).
