# Supplementary material for: Pulsatile-flow culture: a novel system for assessing vascular-cell dynamics
Source: Royal Society of Chemistry journal article supplement (doi:10.1039/d4lc00949e), 2025-01-01
Supplement: d4lc00949e2.pdf [file d4lc00949e2.pdf]

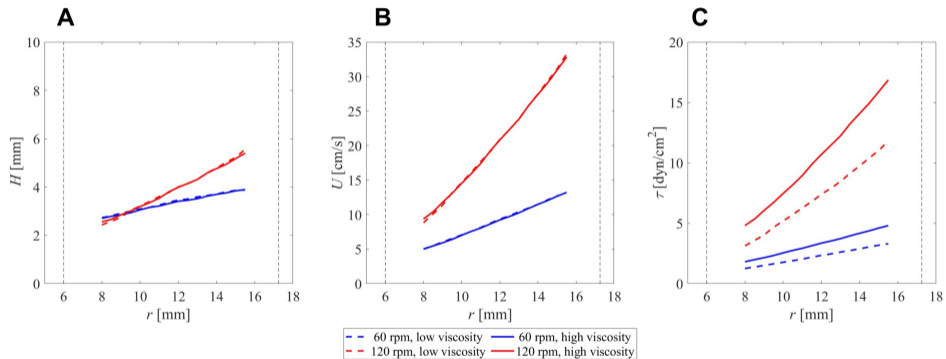

**Fig. S2** Media-wave profiles across cross-sections of pulsatile-flow culture channels using different mixer speeds and viscosities. (A) Media heights across the channel, showing minimal variability between high-viscosity and low-viscosity media. (B) Media-surface speeds were observed to be nearly double at each point for high-viscosity media compared to low-viscosity media. (C) Translated bed shear stresses derived from surface speeds from channel cross-sections. Shear stresses exhibited the greatest variations at higher speeds, particularly in the high-viscosity media.
