# Supplementary material for: Pulsatile-flow culture: a novel system for assessing vascular-cell dynamics
Source: Royal Society of Chemistry journal article supplement (doi:10.1039/d4lc00949e), 2025-01-01
Supplement: d4lc00949e4.pdf [file d4lc00949e4.pdf]

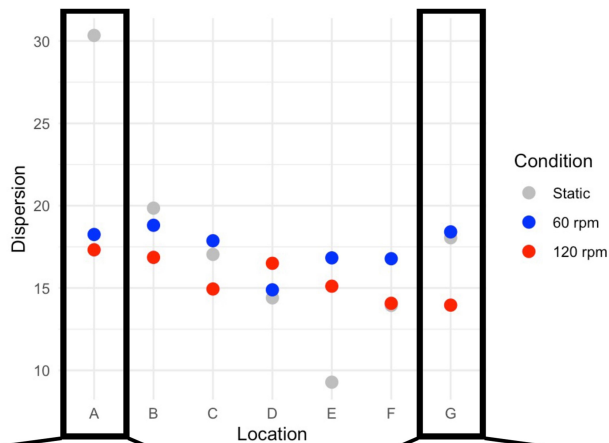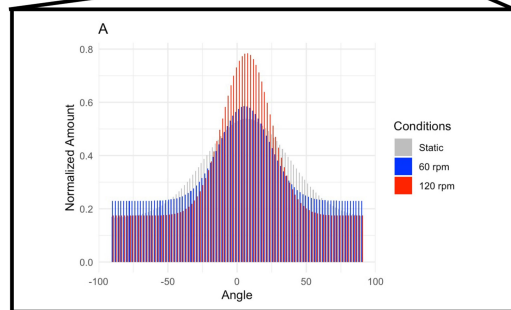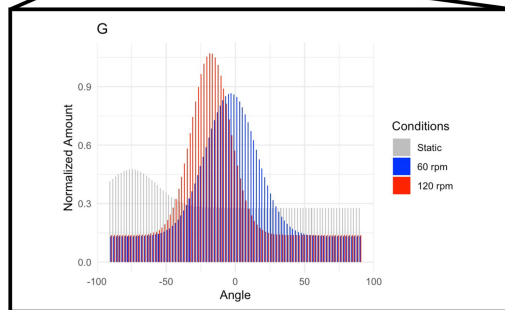

**Fig. S4** Alignment dispersion of cytoskeletal molecule F-actin at each radial location across the channel cross-section. Endothelial cells under 120 rpm flow conditions exhibited lower dispersion of F-actin alignment, indicating a stronger alignment along a dominant angle. Cells under 60 rpm flow conditions displayed higher dispersion, reflecting greater variability in alignment. Under static conditions, F-actin directionality was nonspecific, with no dominant alignment observed.
